# Supplementary material
Source: PubMed Central journal article supplement (PMC518661)

### **Supplementary figure 1: B7-2 deficiency does not affect the effector phase of diabetes**

To examine whether B7-2 played a role in the effector phase of the disease, we purified T cells from the spleen and LN of diabetic NOD females and transferred 7 to 15 x 10<sup>6</sup> T cells into NOD-RAG<sup>-/-</sup> (open triangles) (*n*=7) or NOD-RAG<sup>-/-</sup>B7-2<sup>-/-</sup> (closed circles) (*n*=7) recipients. We measured blood glucose levels weekly to assess the development of diabetes. Diabetic NOD T cells induced diabetes in NOD-RAG<sup>-/-</sup> and NOD-RAG<sup>-/-</sup>B7-2<sup>-/-</sup> recipients with similar kinetics, indicating that B7-2 was dispensable for the effector phase of diabetes induced by a polyclonal diabetogenic memory T cell population

Supplementary figure 1

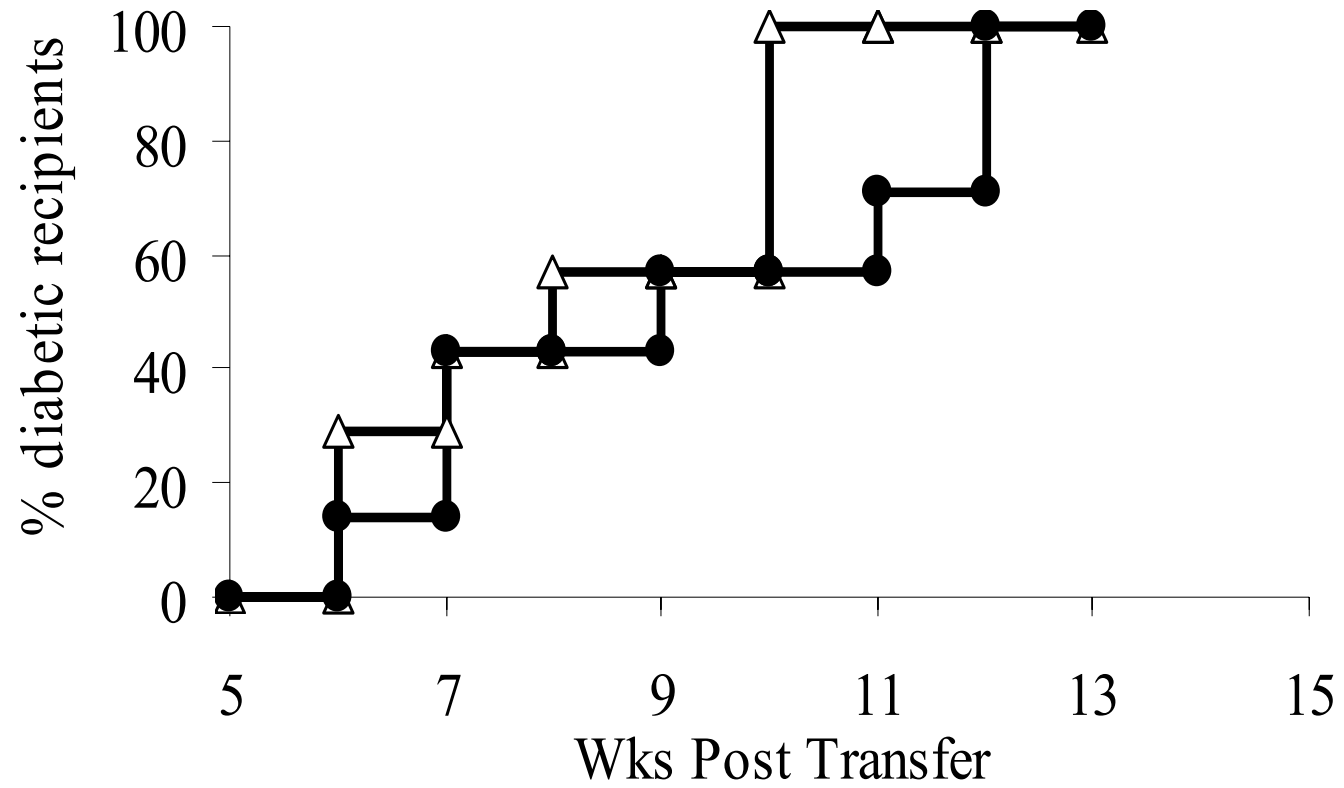

**Supplementary figure 2: B7-2 deficiency affects the activation and/or expansion of a predominant population of pathogenic CD8<sup>+</sup> T cells**

Single-cell suspensions were prepared from pancreatic LN of 16-18 wk old NOD and NOD-B7-2<sup>-/-</sup> mice. Cells were stained with CD8 and NRP-V7-H-2K<sup>d</sup> tetramers that identify a prevalent population of pathogenic CD8<sup>+</sup> T cells (22) or control TUM-H-2K<sup>d</sup> tetramers that contain an irrelevant peptide. Results display NRP-V7-H-2K<sup>d</sup> tetramer (upper panels) and TUM-H-2K<sup>d</sup> control tetramer (lower panels) staining versus CD8 staining in NOD (left panels) and NOD-B7-2<sup>-/-</sup> mice (right panels) (gated on CD4-negative B220-negative cells).

## Supplementary figure 2

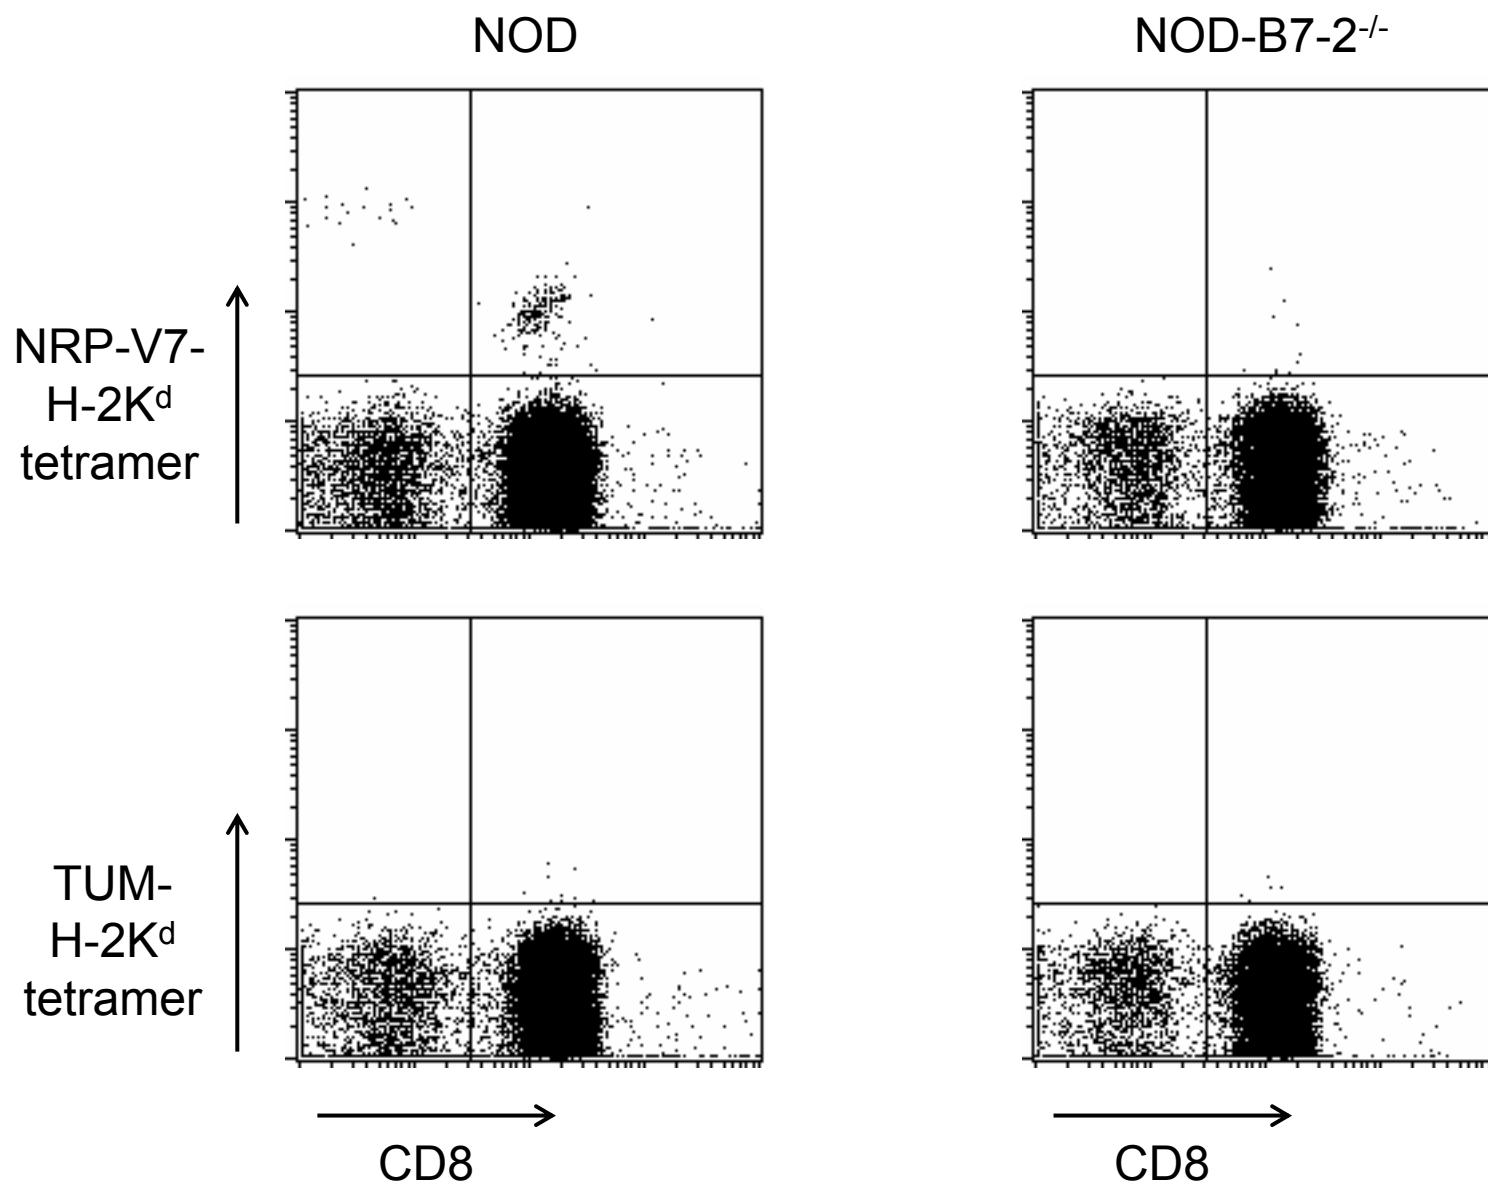

### **Supplementary figure 3: Tregs depletion after anti-CD25 mAbs treatment**

*a.* All groups of mice were thymectomized prior to mAbs treatment. Two weeks before transfer, NOD mice were treated with control Ig and NOD-B7-2<sup>-/-</sup> mice were treated with control Ig or anti-CD25 mAbs (PC61). One day after transfer of BDC2.5 cells, the percentage of CD25<sup>+</sup> CD62L<sup>hi</sup> Tregs in the CD4<sup>+</sup> population was analyzed in the blood. Histograms represent the mean value and standard deviation for each group. Results are pooled from two separate experiments. *b.* The percentage of Tregs was analyzed in the lymph nodes of the same groups of mice two weeks after transfer of BDC2.5 cells (i.e. four weeks after mAbs treatment). *c.* Depletion of Tregs does not affect BDC2.5 proliferation in peripheral LN of NOD-B7-2<sup>-/-</sup> mice, suggesting that deletion of Tregs resulted in islet antigen-specific activation of diabetogenic T cells in the pancreatic lymph nodes rather than non-specific polyclonal activation in all peripheral lymphoid tissues. A representative experiment is shown.

**Supplementary  
figure 3a**

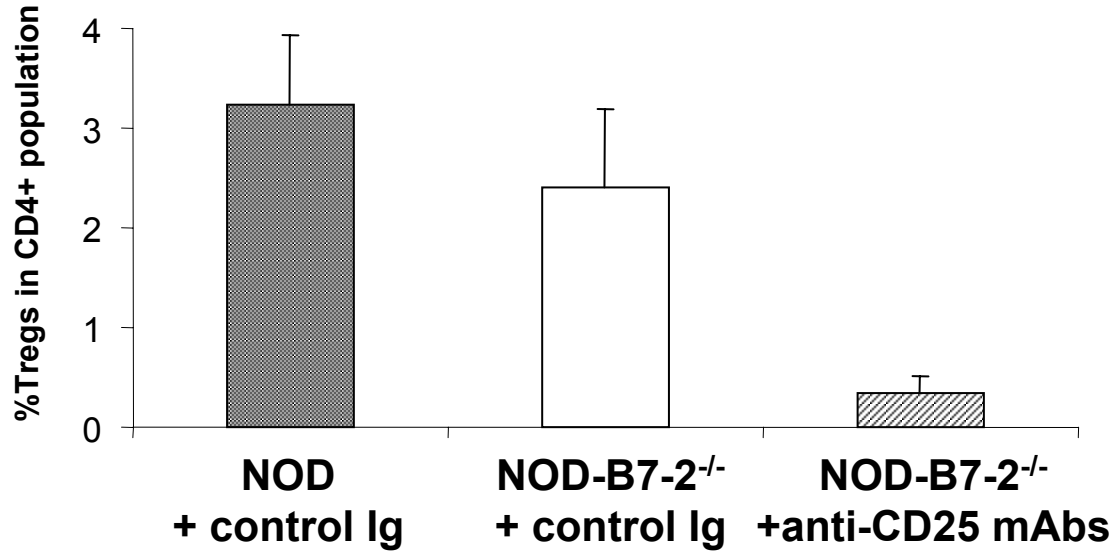

**Supplementary  
figure 3b**

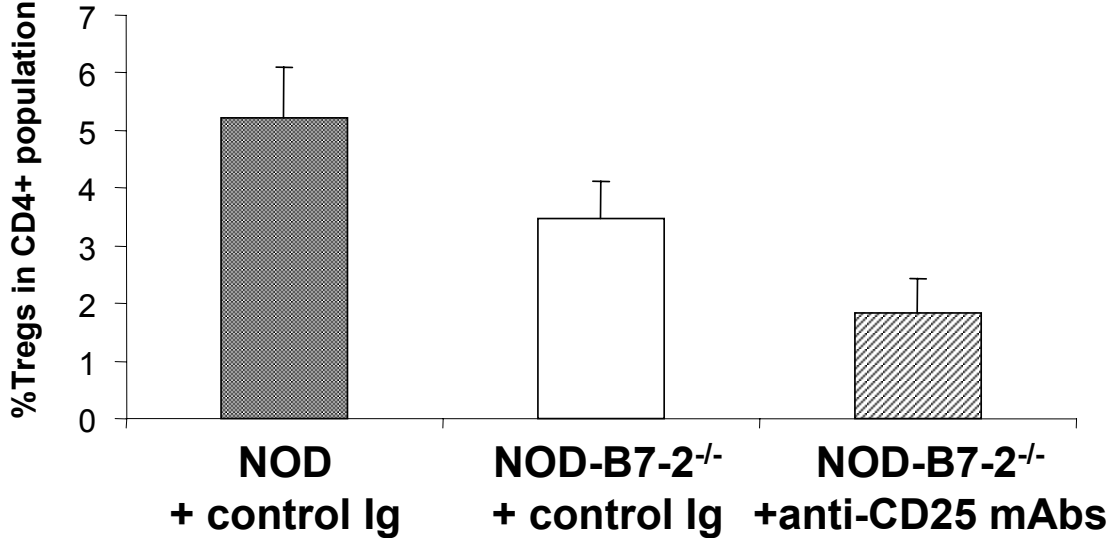

Supplementary  
figure 3c

**NOD  
+ control Ig**

**NOD-B7-2<sup>-/-</sup>  
+ control Ig**

**NOD-B7-2<sup>-/-</sup>  
+ anti-CD25 mAbs**

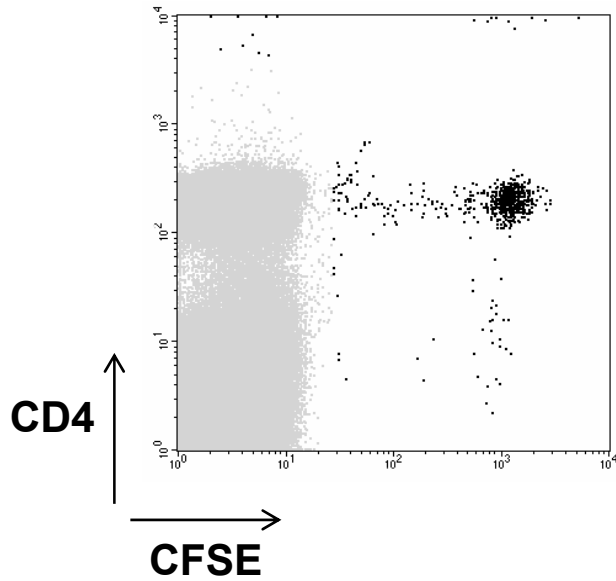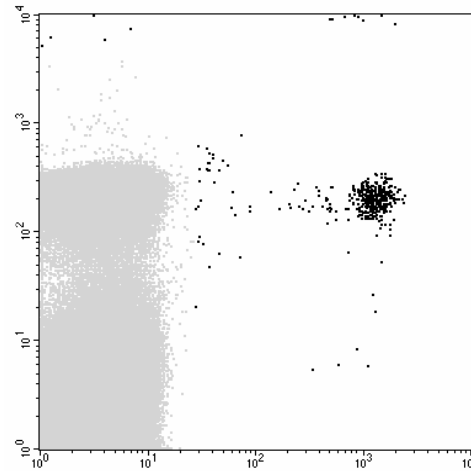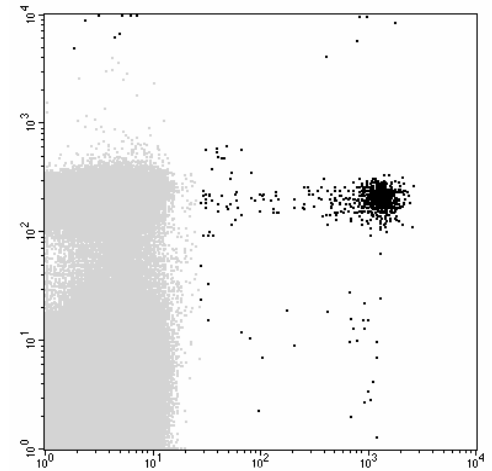

**Supplementary figure 4: Increased expansion and numbers of autoreactive cells in the absence of Tregs**

*a.* CD25-depleted BDC2.5-CD90.1 T cells were labeled with CFSE and transferred into NOD or NOD-CD28<sup>-/-</sup> mice.

Four days later, the proliferation of BDC2.5 cells was assessed in the pancreatic lymph nodes. The histograms represent

the number of undivided cells, cells that underwent 1 to 3 divisions, and cells that underwent 4 or more divisions

(respectively) per million CD4<sup>+</sup> cells, in the pancreatic LN (top) or peripheral LN (bottom). *b.* The total number of

autoreactive BDC2.5 CD4<sup>+</sup> CD90.1<sup>+</sup> in the pancreatic lymph nodes is indicated for NOD and NOD-CD28<sup>-/-</sup> mice. Each

circle represents an individual mouse. Horizontal bars represent the mean value for each group.



# Supplementary figure 4a

**Pancr.  
LN**

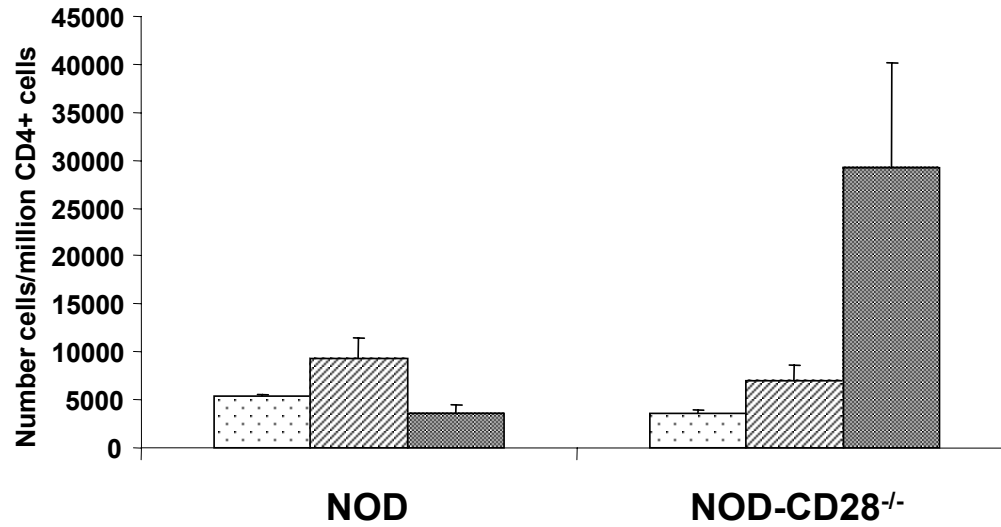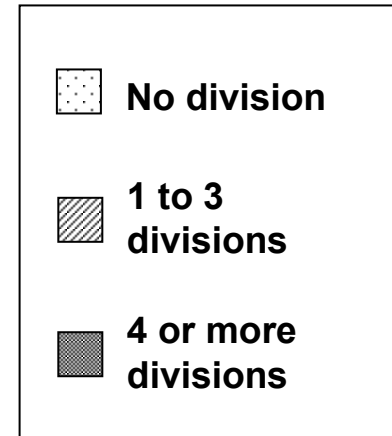

**LN**

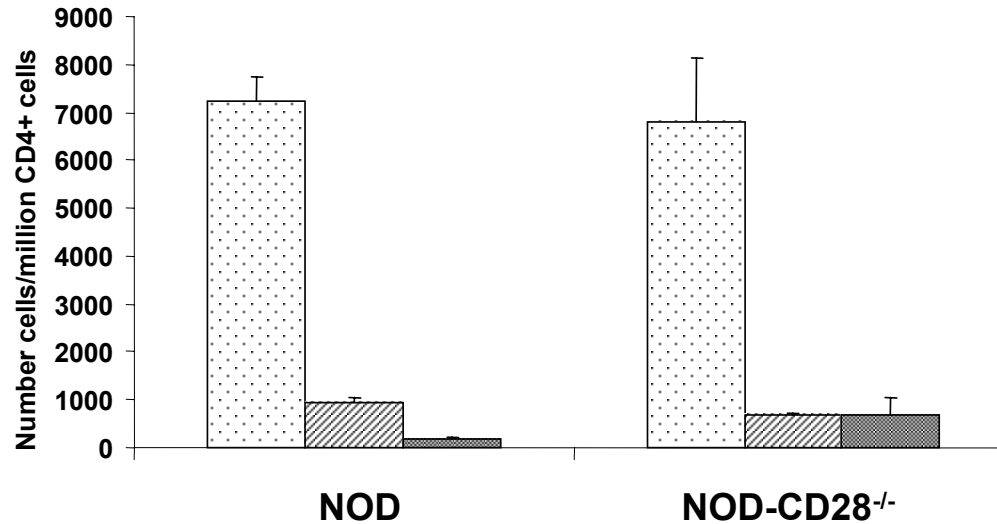

Supplementary figure 4b

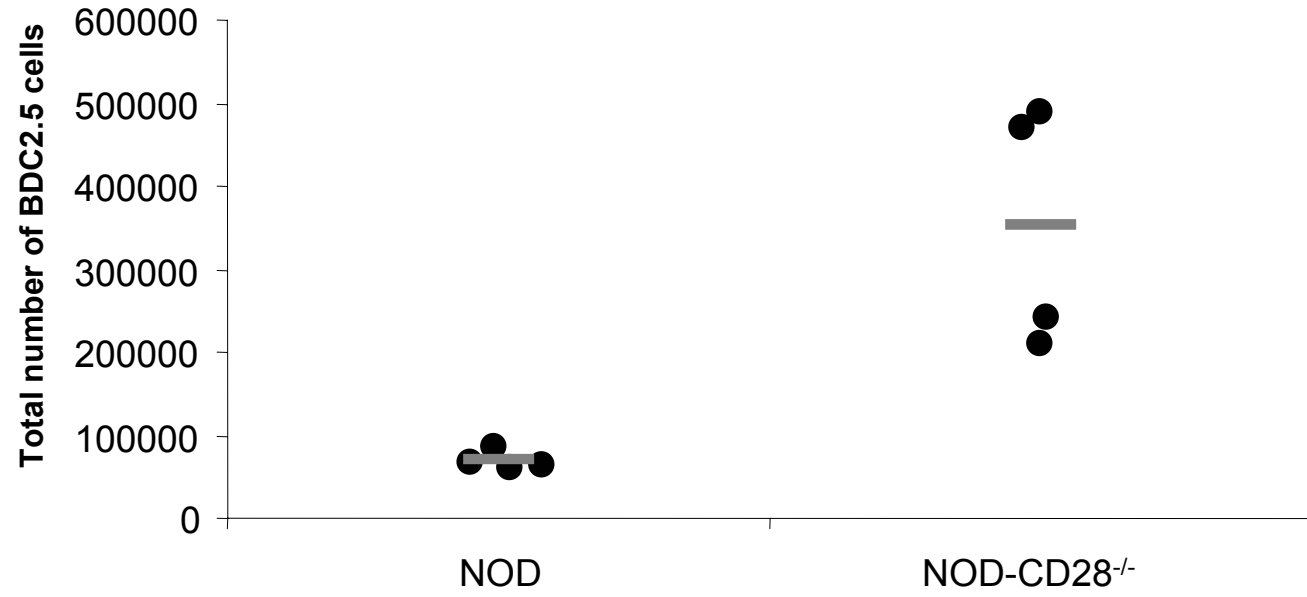

Supplement: JCI0420483sd.pdf [file JCI0420483sd.pdf]
